# Supplementary material for: Rectangular-plate like organosilica microcrystals based on silylated β-diketone and lanthanide ions
Source: Royal Society of Chemistry journal article supplement (doi:10.1039/c0ce00014k), 2010-09-06
Supplement: c0ce00014k.pdf [file c0ce00014k.pdf]

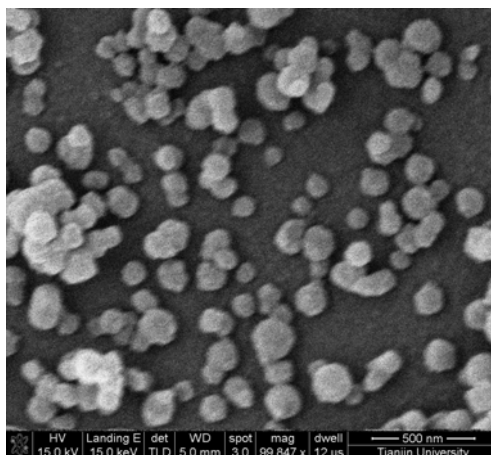

Fig.S1 SEM image of the luminescent hybrid organosilica obtained by reacting  $\text{Eu}^{3+}$  ions with TTA-Si under reflux for 4h. The molar ratio of TTA-Si to  $\text{Eu}^{3+}$  ions is 1:1

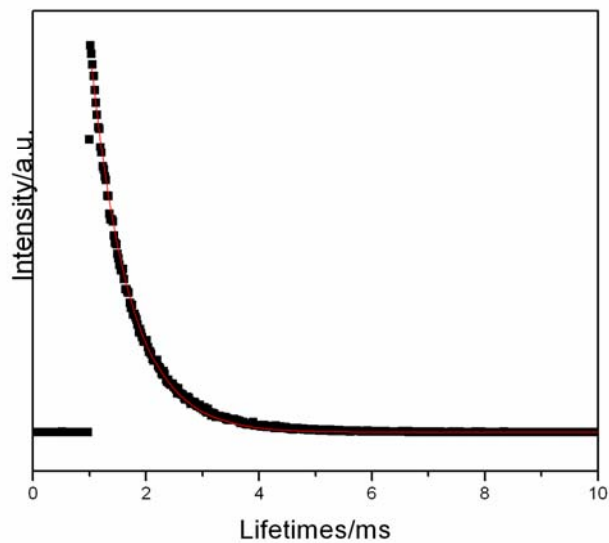

Fig.S2 Decay curve of luminescent organosilica with rectangular-plate morphology  
*squares: experimental data; solid line: fitted according to  $I = I_0 + A \exp[-(t - t_0)/\tau]$*
